# Supplementary material
Source: MDPI journal article supplement (https://www.mdpi.com/2071-1050/15/20/15073)
Supplement: s1 [file s1 › sustainability-2519508-supplementary.pdf]

## S1 - Questionnaire [ID participant: BS/AN n.....]

***Note to the interviewer:** the questions below in blue colour (COVID and T2/follow-up) are to be filled in. If changes are referred, ask the senior to explain briefly why/how the situation changed, and take note of the answer. The questions in black colour (T1) have to be completed with data from the survey carried out in 2019.*

Good morning/Good evening. Am I speaking to Mr. / Mrs. [NAME]?

My name is [NAME, ORGANIZATION]. I don't know if you remember, but last year, on [date of first interview], you kindly accepted to participate in the IN-AGE research project, and to be interviewed at your home. During the interview, you kindly told me about your daily life, relationships with family/friends, use of communication technologies and loneliness. Your narrative was very important for understanding how older people live in our country today, especially those who live alone. Currently I am calling you again first of all to find out how you are doing, and then to ask a few questions about how you are living since the COVID-19 pandemic emergency began. I don't want take up too much of your time. You will be able to respond freely by thinking about your experience over the past few months, from February to today. If you agree to participate, all data collected will be stored anonymously, for scientific research purposes only, and will be used to better understand the consequences of this terrible pandemic for older people.

### COVID

*First of all, we would kindly ask if you have contracted the virus*

- 1 = No
- 2 = Yes

*Then, we would know if, as a result of the pandemic, your situation changed compared to 2019, regarding some aspects of your daily living, as explained below.*

### Age

- 1 = 65-74 years
- 2 = 75-79 years
- 3 = 80-84 years
- 4 = 85 and over

### Gender

- 1 = Female
- 2 = Male

### Living situation

- 1 = Alone
- 2 = With cohabitant Personal Care Assistant (PCA)
- 3 = With not cohabitant/hourly Personal Care Assistant (PCA)

### T2 Living situation

- 1 = Alone
- 2 = With cohabitant Personal Care Assistant (PCA)
- 3 = With not cohabitant/hourly Personal Care Assistant (PCA)

### Marital status

- 1 = Married but not cohabiting
- 2 = Divorced/separated
- 3 = Widowed
- 4 = Single

**T2 Marital status**

- 1 = Married but not cohabiting
- 2 = Divorced/separated
- 3 = Widowed
- 4 = Single

**Education**

- 1 = No title
- 2 = Primary school (5 years)
- 3 = Middle school (3 years)
- 4 = High school (3-5 years)
- 5 = University/similar (3-5 years)

**Relationships with family for confidences**

- 1 = No
- 2 = Yes

**Relationships with friends/neighbours for confidences**

- 1 = No
- 2 = Yes

**T2 Change in overall relationships with family** (*contacts to ask for practical help, for psychological support*)

1 = No change

---

---

2 = Yes, less contacts face-to-face

---

---

3 = Yes, less contacts by telephone

---

---

4 = Yes, more contacts face-to-face

---

---

5 = Yes, more contacts by telephone

---

---

**T2 Change in overall relationships with friends/neighbours** (*contacts to ask for practical help, for psychological support*)

1 = No change

---

---

2 = Yes, less contacts face-to-face

---

---

3 = Yes, less contacts by telephone

---

---

4 = Yes, more contacts face-to-face

---

---

5 = Yes, more contacts by telephone

---

---

**Use of mobile telephone** *(to connect with family, friends, neighbours, physicians, social workers, and so on...)*

- 1 = No
- 2 = Yes

**T2 Use and utility of mobile telephone** *(to connect with family, friends, neighbours, physicians, social workers, and so on...)*

1 = Not used

---

---

2 = Used and useful

---

---

3 = Used but little/not useful

---

---

**Use of smartphone** *(to connect with family, friends, neighbours, physicians, social workers, and so on...)*

- 1 = No
- 2 = Yes

**T2 Use and utility of smartphone** *(to connect with family, friends, neighbours, physicians, social workers, and so on...)*

1 = Not used

---

---

2 = Used and useful

---

---

3 = Used but little/not useful

---

---

**Use of PC/Tablet** *(to connect with family, friends, neighbours, physicians, social workers, and so on...)*

- 1 = No
- 2 = Yes

**T2 Use and utility of PC/Tablet** *(to connect with family, friends, neighbours, physicians, social workers, and so on...)*

1 = Not used

---

---

2 = Used and useful

---

---

3 = Used but little/not useful

---

---

*In this section we would explore your perception of the attention of the people around you during the pandemic. Did you sometimes feel more/less neglected, or experience a worsened/improved sense of loneliness?*

**Level di loneliness**

- 1 = Absent/Mild
- 2 = Moderate
- 3 = High
- 4 = Very high

**T2 Changes in loneliness**

1 = No

---

---

2 = Yes, worsened

---

---

3 = Yes, improved

---

---

*Overall, during this emergency period due to the COVID-19 pandemic, did you think your living conditions have remained the same or changed? Is there anything that particularly worried you?*

**T2\_FEAR1 > Respondent contracting the virus**

1 = No

---

---

2 = Yes

---

---

**T2\_FEAR2 > Respondent contracting the virus and dying**

1 = No

---

---

2 = Yes

---

---

**T2\_FEAR3 > Not to receive adequate assistance if sick**

1 = No

---

---

2 = Yes

---

---

**T2\_FEAR4 > Family members contracting the virus**

1 = No

---

---

2 = Yes

---

---

**T2\_FEAR5 > Family members left without work**

1 = No

---

---

2 = Yes

---

---

**T2\_FEAR6 > Other**

1 = No

---

---

2 = Yes

---

---

*We sincerely thank you for your cooperation, but before saying goodbye we would like to inform you that following the emergency caused by the COVID-19 pandemic, we offer free psychological support (by telephone) to the participants in the study, that is available on (telephone number of each partner, days, hours). By calling this number, you can express your concerns, difficulties or even ask simple questions and request practical advice.*
